18. Urner M, Schlöpfer M, Herrmann IK, Hasler M, Schimmer RR, Booy C, Roth Z'graggen B, Rehrauer H, Aigner F, Minshall RD, Stark WJ, Beck-Schimmer B: Insight into the beneficial immunomodulatory mechanism of the sevoflurane metabolite hexafluoro-2-propanol in a rat model of endotoxaemia. *Clin Exp Immunol* 2015; 181:468–79
19. Rodríguez-Fuster A, Belda-Sanchis J, Aguiló R, Embun R, Mojal S, Call S, Molins L, Rivas de Andrés JJ; GECMP-CCR-SEPAR: Morbidity and mortality in a large series of surgical patients with pulmonary metastases of colorectal carcinoma: A prospective multicentre Spanish study (GECMP-CCR-SEPAR). *Eur J Cardiothorac Surg* 2014; 45:671–6
20. Beck-Schimmer B, Bonvini JM, Schadde E, Dutkowski P, Oberkofler CE, Lesurtel M, DeOliveira ML, Figueira ER, Rocha Filho JA, Auler JO Jr, D'Albuquerque LA, Reyntjens K, Wouters P, Rogiers X, Debaerdemaeker L, Ganter MT, Weber A, Puhon MA, Clavien PA, Breitenstein S: Conditioning with sevoflurane in liver transplantation: Results of a multicenter randomized controlled trial. *Transplantation* 2015; 99:1606–12
21. Lurati Buse GA, Schumacher P, Seeberger E, Studer W, Schuman RM, Fassl J, Kasper J, Filipovic M, Bolliger D, Seeberger MD: Randomized comparison of sevoflurane *versus* propofol to reduce perioperative myocardial ischemia in patients undergoing noncardiac surgery. *Circulation* 2012; 126:2696–704
22. Jordan S, Mitchell JA, Quinlan GJ, Goldstraw P, Evans TW: The pathogenesis of lung injury following pulmonary resection. *Eur Respir J* 2000; 15:790–9

## ANESTHESIOLOGY REFLECTIONS FROM THE WOOD LIBRARY-MUSEUM

### McCarthy's 1953 Compilation: A Secondary Saturation of McKesson's "Anesthesia Papers"

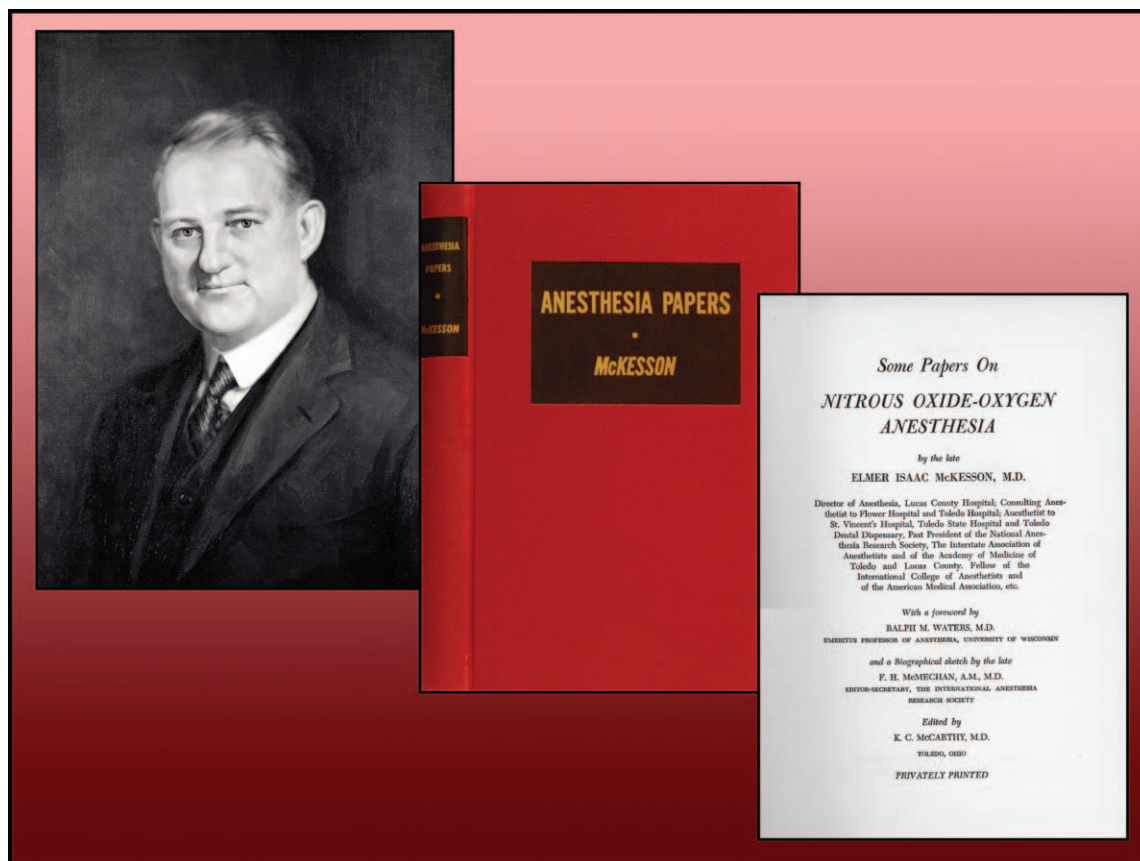

One of the founders of the National (later International) Anesthesia Research Society, Elmer Isaac "Ira" McKesson (1881 to 1935, *left*) led a trio of physician-anesthetists from Toledo, Ohio, who promoted unsupplemented nitrous oxide-oxygen anesthesia. Besides brief use of 100% laughing gas at anesthetic induction ("primary saturation"), the Toledo trio promoted another brief blast of pure laughing gas for muscle relaxation of already-anesthetized patients ("secondary saturation"). After McKesson died, his partner Frederick W. Clement, M.D., saturated readers with McKessonalia in three editions of *Nitrous Oxide-Oxygen Anesthesia*, all published three or more years after brain lesions were associated with hypoxic nitrous oxide techniques. In 1953 the youngest of the Toledo trio, Kenneth C. McCarthy, M.D., published a red-covered "secondary saturation" of McKesson "Anesthesia Papers" (*middle*), formally titled (*right*) as *Some Papers on Nitrous Oxide-Oxygen Anesthesia*. (Copyright © the American Society of Anesthesiologists' Wood Library-Museum of Anesthesiology)

George S. Bause, M.D., M.P.H., Honorary Curator, ASA's Wood Library-Museum of Anesthesiology, Schaumburg, Illinois, and Clinical Associate Professor, Case Western Reserve University, Cleveland, Ohio. UJYC@aol.com.
